STICKY WICKET

# Mole's Wow! So now you have your own lab!

## Part V – The plan

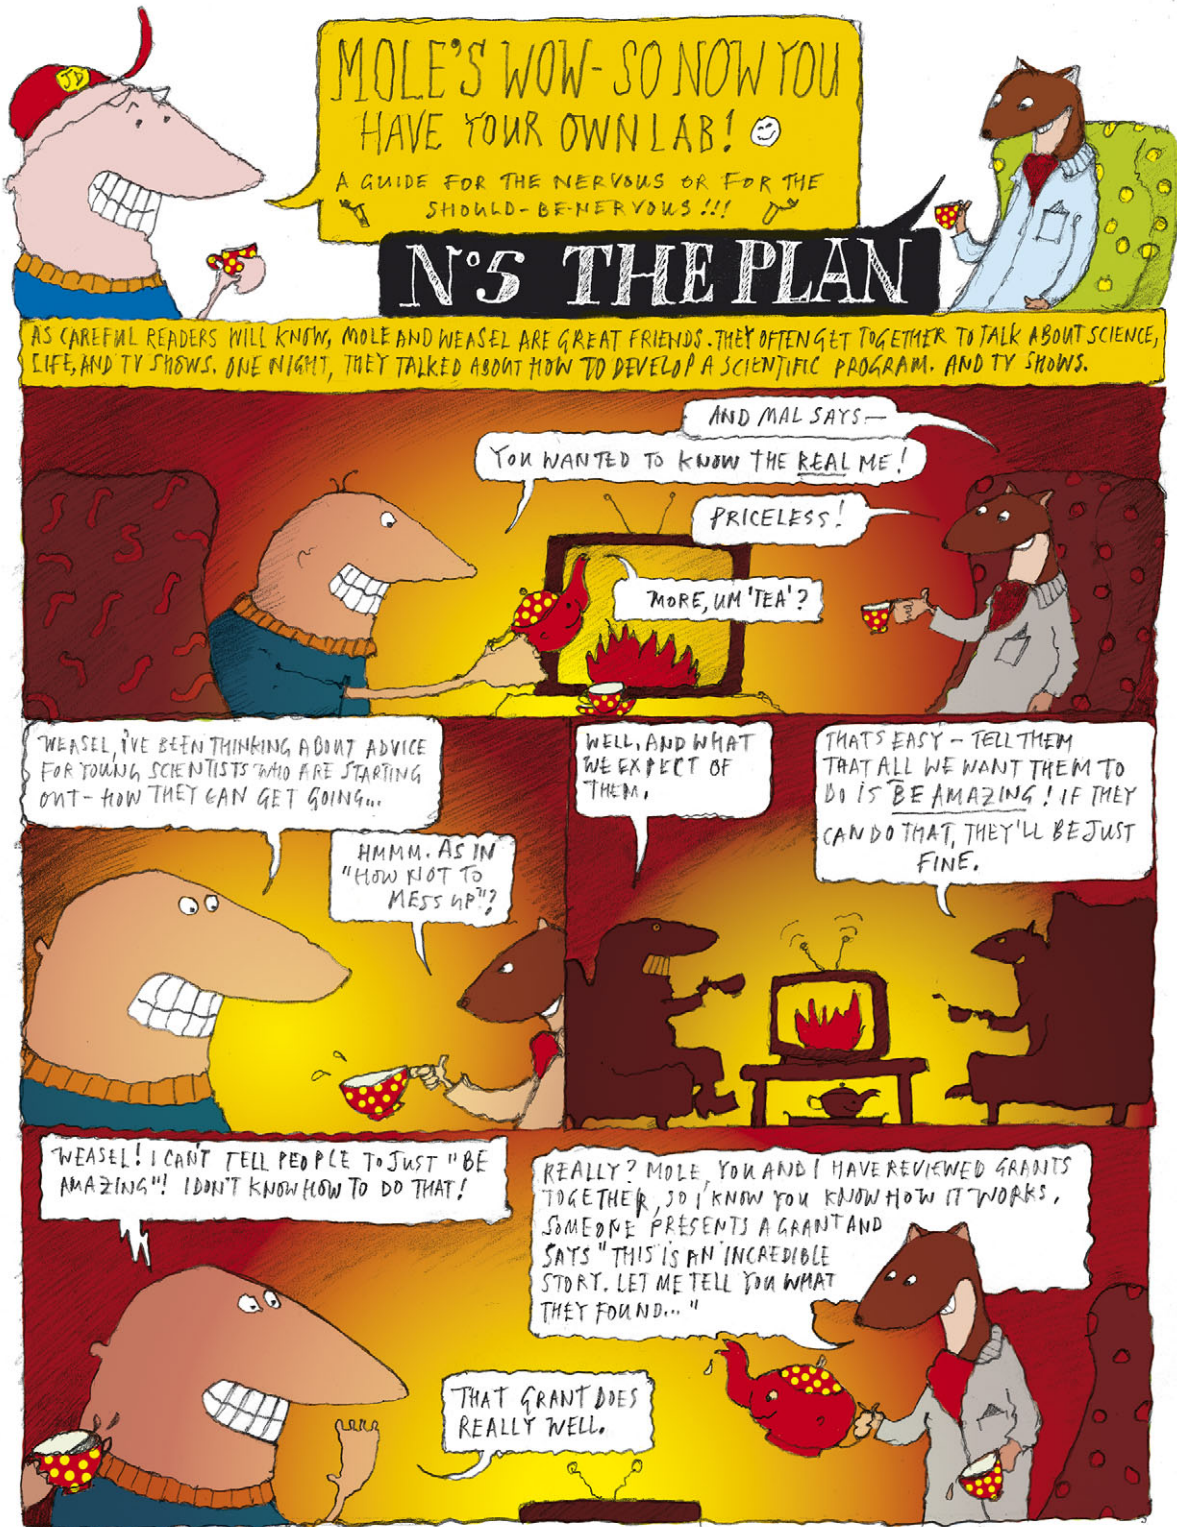

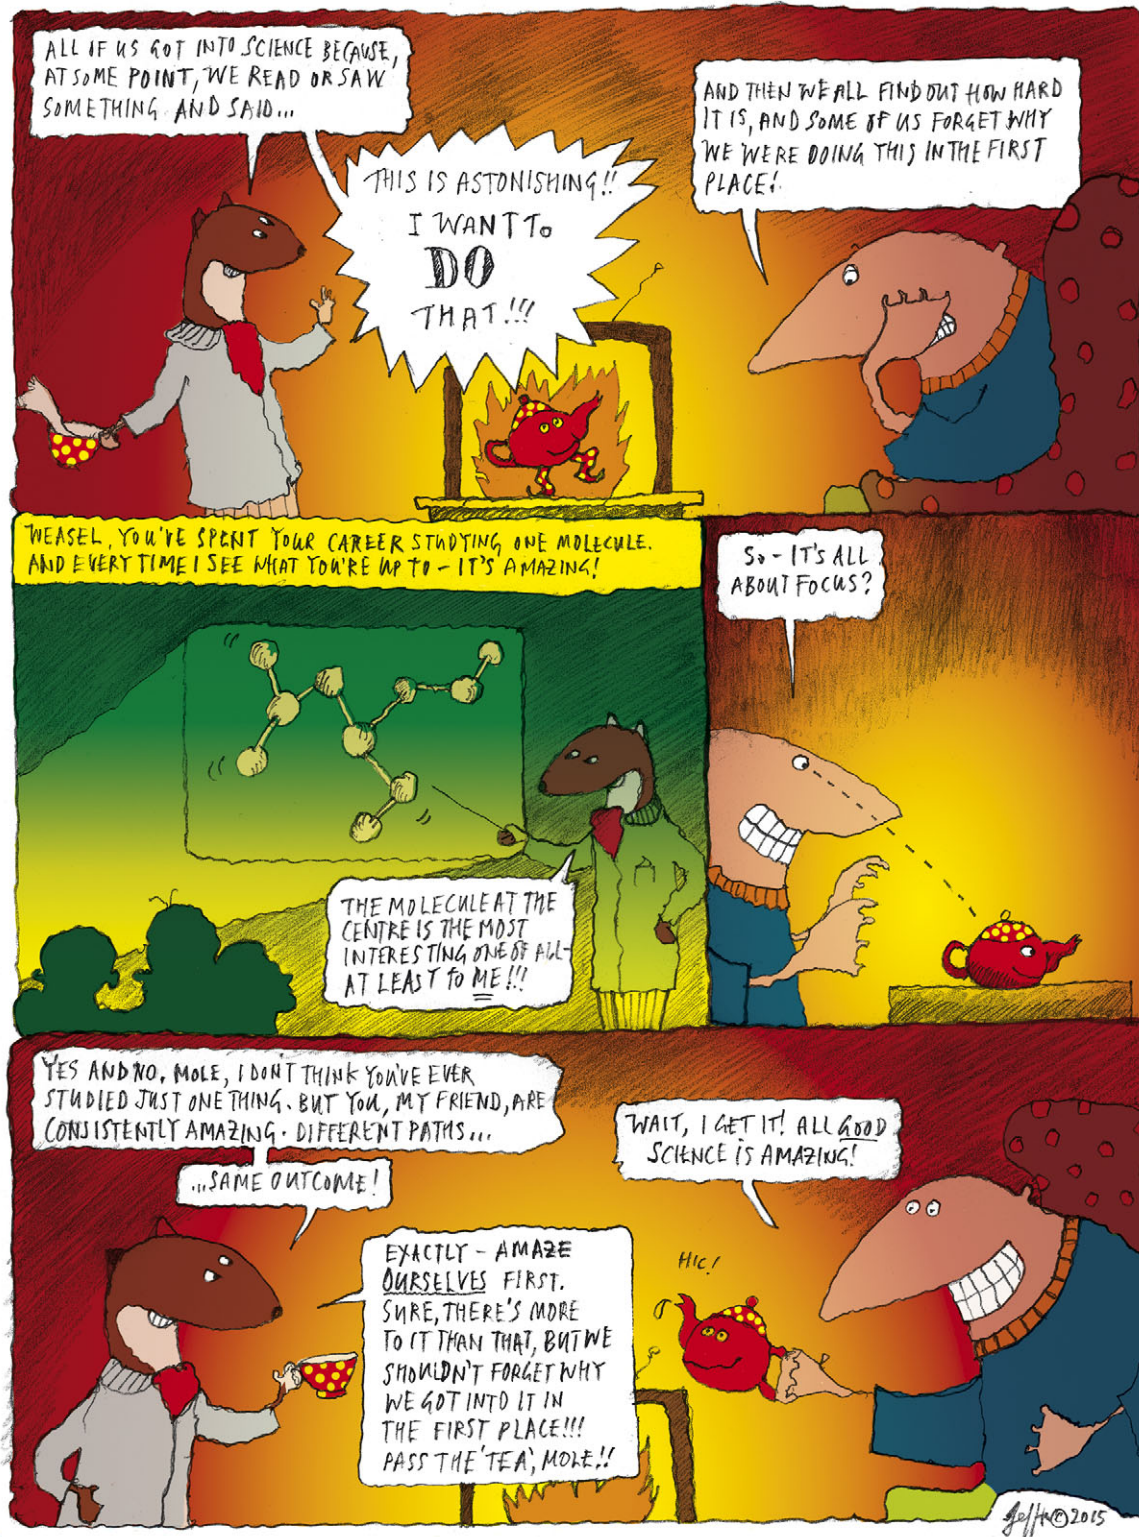

Source: https://cob.silverchair.com/jcs/article-pdf/128/17/3165/1954394/jcs177212.pdf
